# Supplementary material for: Deep learning for sensitive detection of Helicobacter Pylori in gastric biopsies
Source: PubMed Central journal article supplement (PMC7731757; doi:10.1186/s12876-020-01494-7), 2020-12-11

**Figure S1**

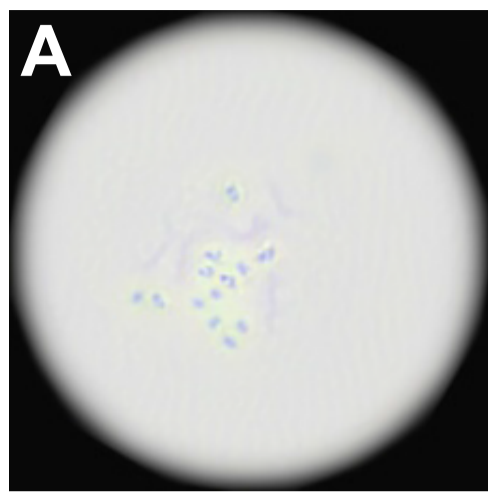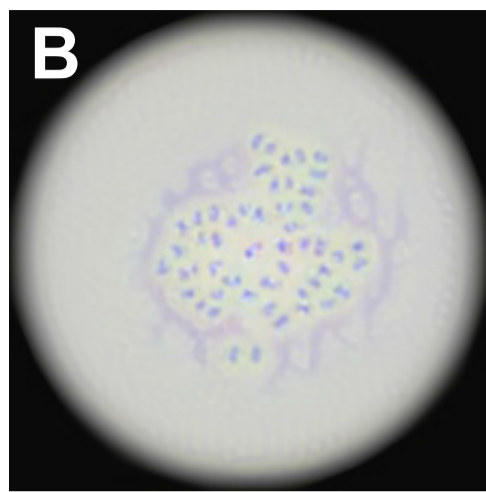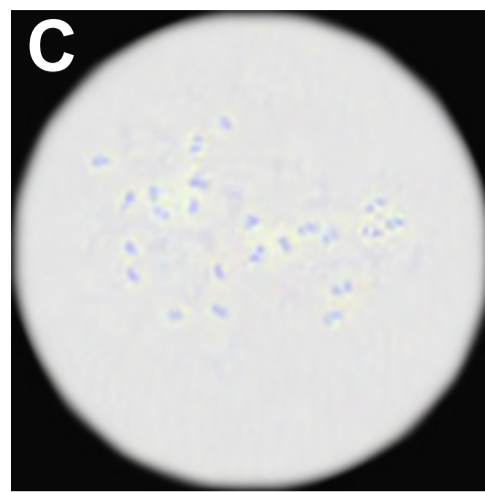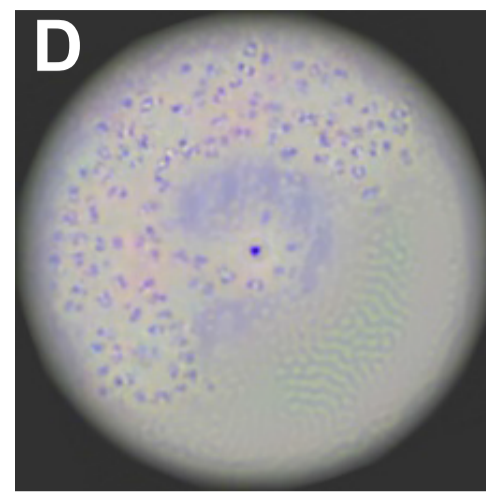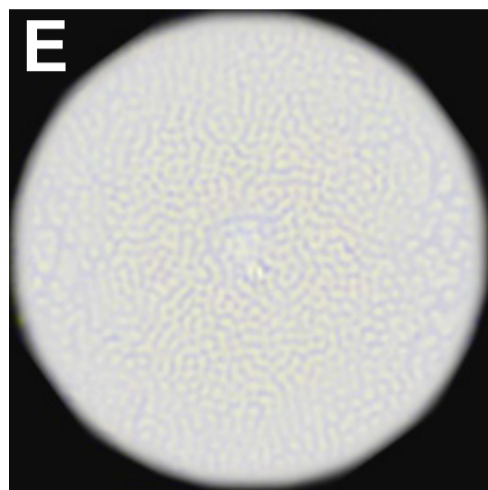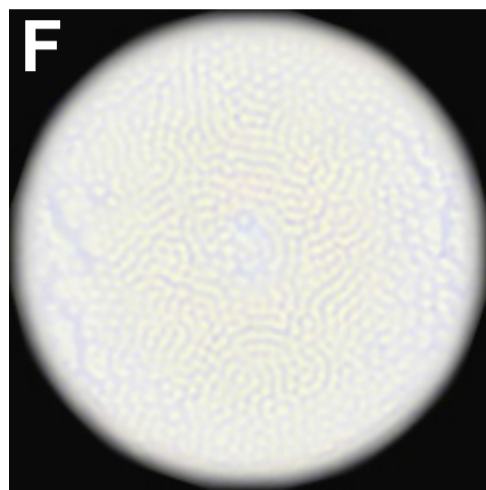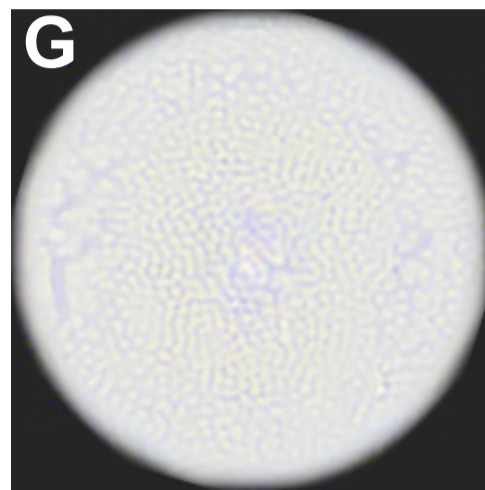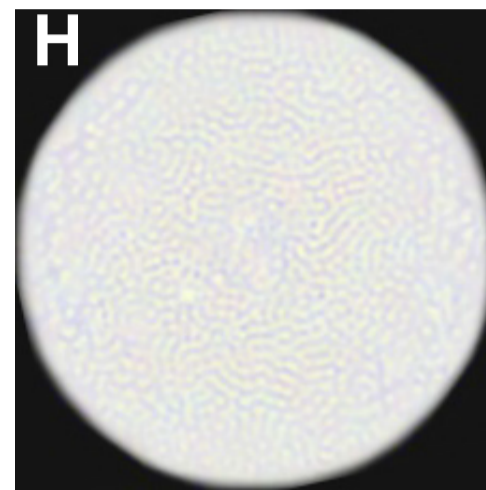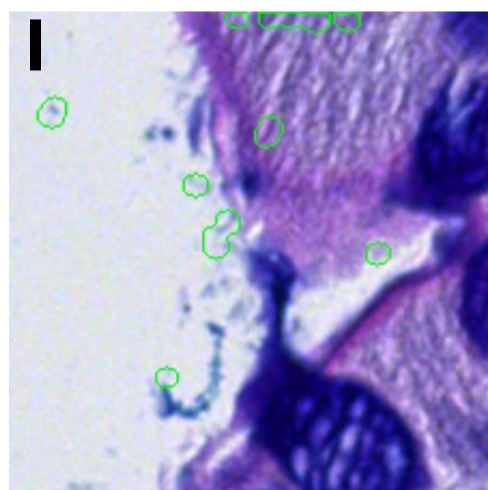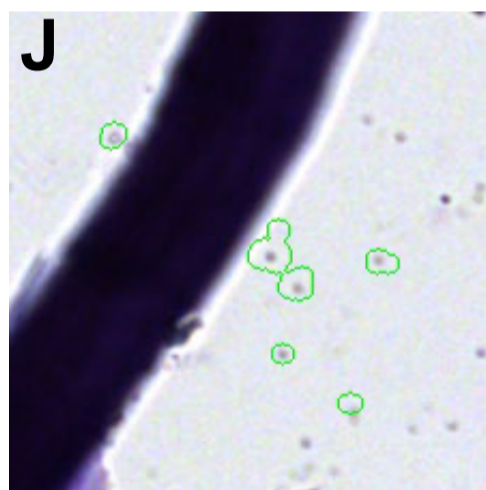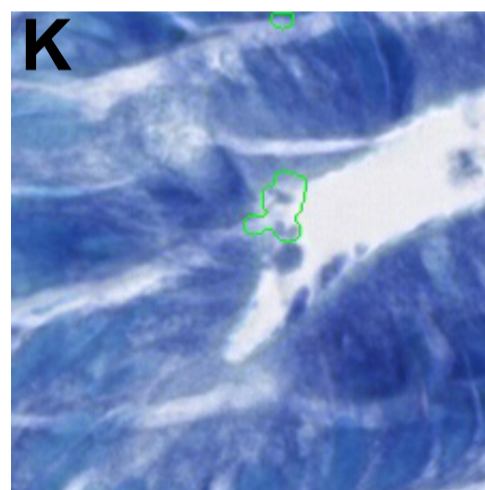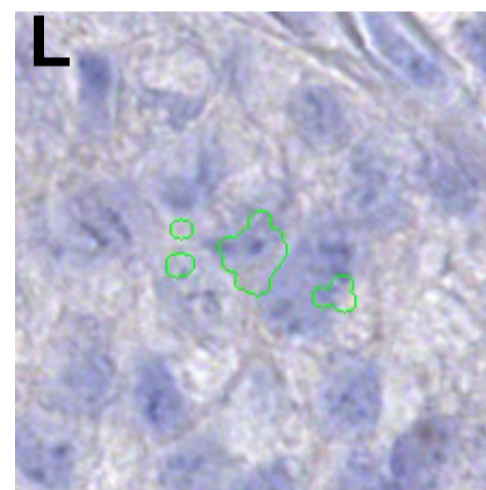

Supplement: 12876_2020_1494_MOESM2_ESM.pdf [file 12876_2020_1494_MOESM2_ESM.pdf]
